# Supplementary material for: K Index is a Reliable Marker of Intrathecal Synthesis, and an Alternative to IgG Index in Multiple Sclerosis Diagnostic Work-Up
Source: PubMed Central journal article supplement (PMC6518364; doi:10.3390/jcm8040446), 2019-04-02

## Methods

Intrathecally synthesized KFLC was also calculated using a non-linear function by relating each  $KFLC_{ratio}$  (CSF kFLC/serum kFLC) to its corresponding QAlb-dependent upper normal limit ( $KFLC_{lim}$ ).  $KFLC_{lim}$  has been determined in a large cohort of patients in a previous study (Presslauer), specified by the following formula:  $kFLC_{lim} = 0.9358 \times QAlb^{0.6687}$ .

The change of KFLC concentration in CSF was calculated as the difference between  $KFLC_{ratio}$  and  $kFLC_{lim}$ , and finally corrected for the absolute KFLC serum concentration:  $KFLC_{loc} = (KFLC_{ratio} - KFLC_{lim}) \times KFLC_{serum}$ .

The same approach was employed to calculate identical parameters for intrathecally synthesized IgG ( $IgG_{loc}$ ).

**Table S1:** Correlations between IgG index and KFLC index among patients with multiple sclerosis (MS), inflammatory diseases (ID) and non-inflammatory diseases (NID).

| Parameters | <i>n</i> | <i>r</i> | <i>r</i> <sup>2</sup> | <i>p</i> |
|------------|----------|----------|-----------------------|----------|
| All        | 385      | 0.7469   | 0.5579                | <0.0001  |
| MS         | 127      | 0.7780   | 0.6053                | <0.0001  |
| ID         | 117      | 0.6265   | 0.3921                | <0.0001  |
| NID        | 141      | 0.6789   | 0.4609                | <0.0001  |

**Figure S1:** KFLC loc and IgG loc in MS (group 1), ID (group 2) and NID (group 3) patients.

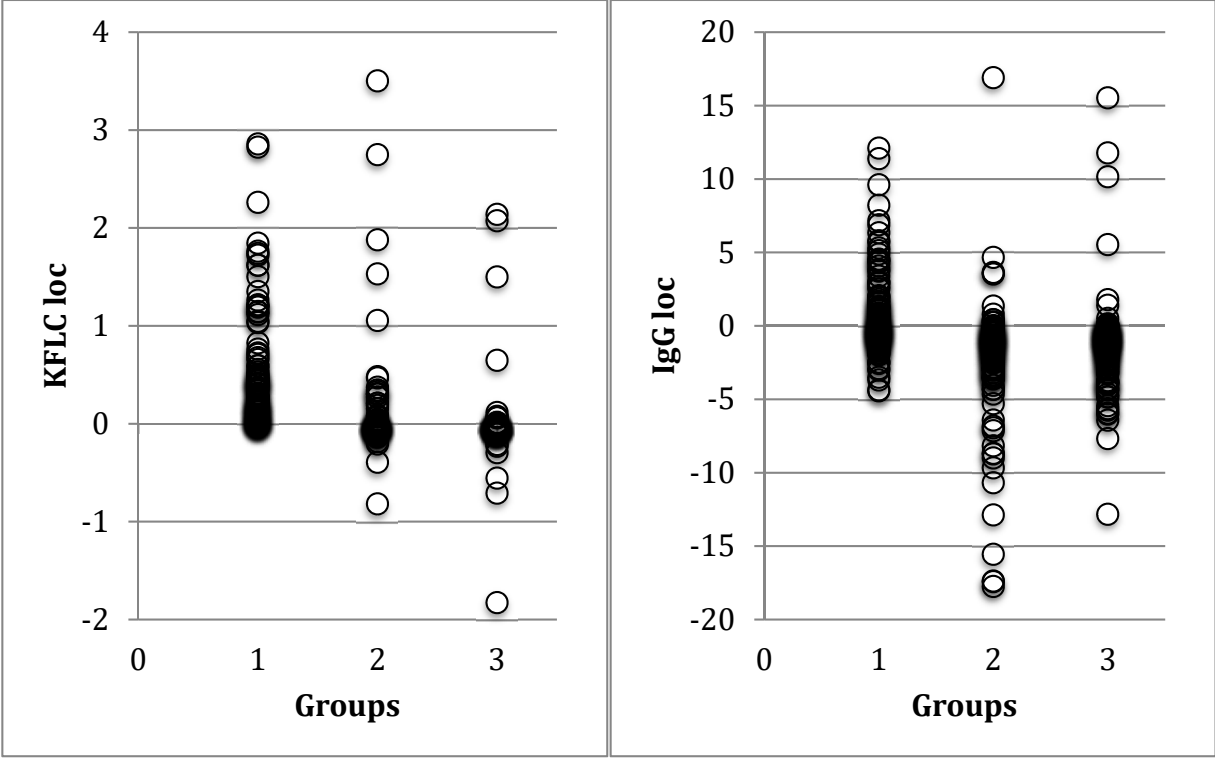

**Figure S2:** Correlations between KFLC index, IgG index, KFLC loc and IgG loc in patients with multiple sclerosis.

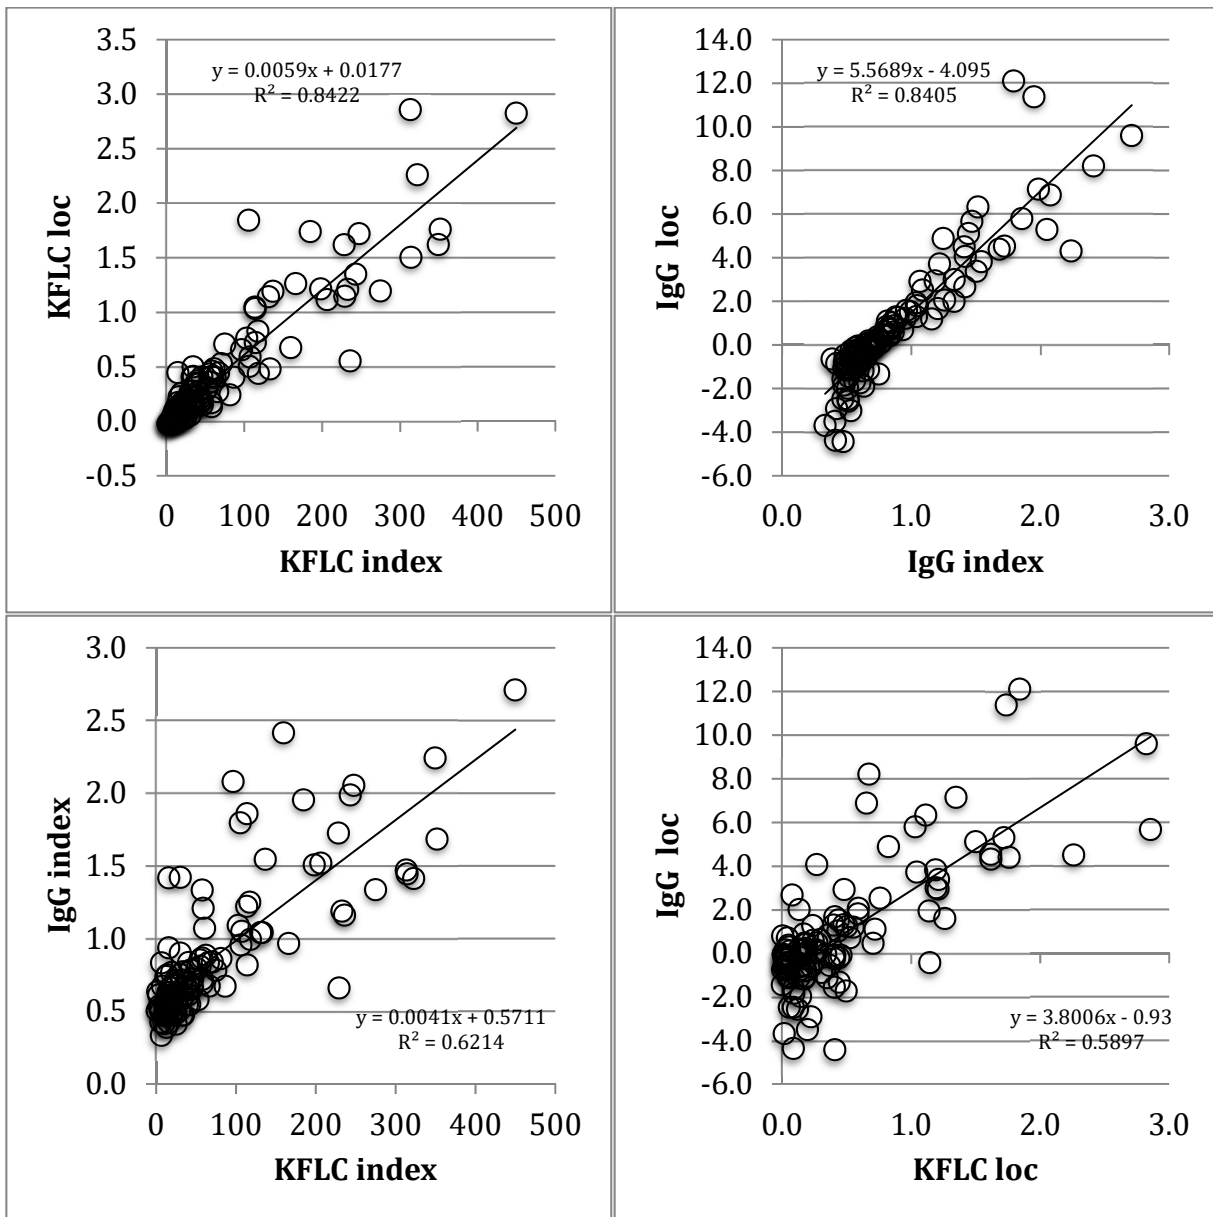

Supplement: jcm-08-00446-s001.pdf [file jcm-08-00446-s001.pdf]
